# Supplementary material for: Evaluates educational interventions for waste separation, applying Value-Belief-Norm Theory and PRECEDE-PROCEED Model in Iran
Source: Research Square preprint supplement (doi:10.21203/rs.3.rs-6506584/v1), 2025-06-06
Supplement: Supplementary file 1 [file de914e9dc5cb04aa5dbb52ef.docx]

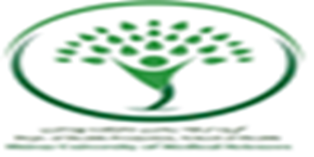

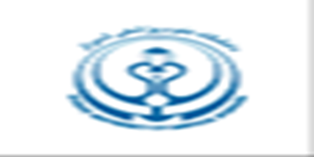


**Questionnaire code: ...................**

1-Age:.................

2-Education: Sub-diploma of university education

3- Spouse's education: I don't have a spouse with a university degree

4- Spouse's occupation: Unemployed, employed, retired, housewife, I do not have a wife

5- Marital status: single, married

**The second part of the questionnaire: waste separation questionnaire**

| Row | **Please mark the most appropriate answer with a cross.** | **Recyclable** | **Not recyclable** | **I don't know** |
| --- | --- | --- | --- | --- |
| 1 | Plastic containers and items |  |  |  |
| 2 | Paper, magazines and newspapers |  |  |  |
| 3 | Juice and milk cartons |  |  |  |
| 4 | Sweetie and pizza boxes |  |  |  |
| 5 | Disposable plastic containers |  |  |  |
| 6 | Discarded computers and their accessories |  |  |  |
| 7 | Plastic bottle caps |  |  |  |
| 8 | Glass containers |  |  |  |
| 9 | Light bulbs (light bulbs) |  |  |  |
| 10 | Disposable paper containers |  |  |  |
| 11 | Metal cans (such as cans for beer, soda, canned goods, compote, tuna, etc.) |  |  |  |
| 12 | Home electrical appliances (mobile phones and mobile phone chargers, damaged parts of electrical appliances, batteries and CDs) |  |  |  |
| 13 | Plastic bottles of yogurt and soda |  |  |  |
| 14 | Toys |  |  |  |
| 15 | Wet waste (food waste, etc.) |  |  |  |

| Row | **Please mark the most appropriate answer with a cross.** | **I completely agree** | **I agree** | **I have no opinion** | **I disagree** | **I completely disagree** |
| --- | --- | --- | --- | --- | --- | --- |
| 16 | I will separate waste if it is economically beneficial for me. |  |  |  |  |  |
| 17 | My neighbors look at me with respect when I separate waste. |  |  |  |  |  |
| 18 | I will separate waste if I am paid for it |  |  |  |  |  |
| 19 | I will separate waste on condition that the municipality provides the necessary facilities and equipment near my home |  |  |  |  |  |
| 20 | I separate waste because it reduces the risk of infectious diseases for me and my family |  |  |  |  |  |
| 21 | I separate waste to reduce the burden on the cleaners. |  |  |  |  |  |
| 22 | I try to help my country's economic cycle by separating waste |  |  |  |  |  |
| 23 | I separate waste to prevent the transmission of diseases to periodic garbage collectors and child laborers. |  |  |  |  |  |
| 24 | I would like to help preserve resources for future generations by separating waste |  |  |  |  |  |
| 25 | Because I value the cleanliness of the environment, I separate waste |  |  |  |  |  |
| 26 | I respect the planet by separating waste. |  |  |  |  |  |
| 27 | I prefer to help protect natural resources (water, air, and soil) by separating waste |  |  |  |  |  |
| 28 | I don't care if separating waste helps preserve the environment. |  |  |  |  |  |
| 29 | I think nature is strong enough to sort out its own waste.. |  |  |  |  |  |
| 30 | I believe that waste separation can help balance nature. |  |  |  |  |  |
| 31 | I think nature is strong enough to separate waste itself |  |  |  |  |  |
| 32 | I believe that separating waste helps reduce global warming. |  |  |  |  |  |
| 33 | I think that separating waste has no effect on air pollution |  |  |  |  |  |
| 34 | I believe that waste separation has an impact on the life and survival of plants and animals. |  |  |  |  |  |
| 35 | I believe that separating waste has nothing to do with soil pollution. |  |  |  |  |  |
| 36 | Not separating waste increases environmental pollution |  |  |  |  |  |
| 37 | Failure to separate waste increases greenhouse gas emissions such as carbon dioxide, etc. |  |  |  |  |  |
| 38 | Failure to separate waste causes waste of resources |  |  |  |  |  |
| 39 | Failure to separate waste causes global warming. |  |  |  |  |  |
| 40 | Failure to separate waste can increase the destructive effects of waste on the environment |  |  |  |  |  |
| 41 | Failure to separate waste can increase the incidence of infectious diseases |  |  |  |  |  |
| 42 | We are all responsible for the environmental problems caused by failure to separate waste |  |  |  |  |  |
| 43 | I believe that waste separation should be done by the municipality |  |  |  |  |  |
| 44 | If I do not separate the waste properly, I feel guilty. |  |  |  |  |  |
| 45 | I feel that waste separation is a good thing. |  |  |  |  |  |
| 46 | I feel obligated to do whatever I can to recycle. |  |  |  |  |  |
| 47 | Everyone in society should do what they can to separate waste |  |  |  |  |  |
| 48 | I do not feel obligated to separate waste. |  |  |  |  |  |
| 49 | I feel morally obligated to put the separated waste in the designated places by the municipality at the appointed times |  |  |  |  |  |
| 50 | I feel morally obligated to educate others about waste separation. |  |  |  |  |  |
| 51 | I feel good about myself when I separate waste. |  |  |  |  |  |
| 52 | I feel upset if others do not separate their waste. |  |  |  |  |  |
| 53 | My family members ask me to separate waste at home. |  |  |  |  |  |
| 54 | My family members approve of my concerns about the environment. |  |  |  |  |  |
| 55 | My relatives approve of my efforts to separate waste. |  |  |  |  |  |
| 56 | My family members ask me to spend enough time separating waste. |  |  |  |  |  |
| 57 | Most of my friends separate waste at home. |  |  |  |  |  |
| 58 | Most of my relatives keep special garbage bags at home for waste separation. |  |  |  |  |  |
| 59 | Most of the residents in my complex (neighborhood) separate their waste at home. |  |  |  |  |  |
| 60 | I can separate household waste correctly. |  |  |  |  |  |
| 61 | I am not skilled enough in how to properly dispose of different types of waste. |  |  |  |  |  |
| 62 | I am able to organize my time in such a way that I can separate my waste. |  |  |  |  |  |
| 63 | I can obtain the necessary information about waste separation from reliable sources. |  |  |  |  |  |
| 64 | In our neighborhood, the municipality provides special containers for waste separation for my family. |  |  |  |  |  |
| 65 | The municipality provides the necessary training to the people in our neighborhood regarding waste separation. |  |  |  |  |  |
| 66 | In our neighborhood, there is a specific time for collecting separated waste. |  |  |  |  |  |
| 67 | My family members help me to separate the waste. |  |  |  |  |  |
| 68 | Neighbors in our neighborhood cooperate in waste separation. |  |  |  |  |  |
| 69 | Whenever I have a question about waste separation, there are people who give me information. |  |  |  |  |  |
| 70 | The municipality provides us with the necessary equipment (such as Cartoon Plus) for waste separation for free or at a reasonable price. |  |  |  |  |  |
| 71 | People in our neighborhood encourage each other to separate waste. |  |  |  |  |  |
| 72 | Other relevant organizations (health center, environment) support the waste separation program. |  |  |  |  |  |
| 73 | I plan to separate household waste at home in the near future. |  |  |  |  |  |
| 74 | I plan to separate paper waste such as (paper cups, waste paper, etc.) from other waste at home in the near future. |  |  |  |  |  |
| 75 | I plan to separate household electrical appliances (mobile phones and mobile phone chargers, broken parts of electrical appliances, batteries and CDs, etc.) from other waste in the near future. |  |  |  |  |  |
| 76 | I plan to separate metal cans (such as cans of beer, soda, canned goods, etc.) from other waste in the near future. |  |  |  |  |  |
| 77 | I plan to separate wet waste such as (vegetables, fruit peels, leftover food, egg shells, tea bags and tea grounds) from other waste in the near future. |  |  |  |  |  |
| 78 | I plan to separate plastic waste such as (plastic containers, etc.) from other waste in the near future. |  |  |  |  |  |
| 79 | I plan to set aside a part of the house to store the separated waste in the near future. |  |  |  |  |  |
| 80 | I plan to separate waste when traveling in the near future. |  |  |  |  |  |

| Row | **Please mark the most appropriate answer with a cross.** | Always | Most of the time | Sometimes | Rarely | Never |
| --- | --- | --- | --- | --- | --- | --- |
| 81 | Paper waste separation |  |  |  |  |  |
| 82 | Electrical waste separation |  |  |  |  |  |
| 83 | Metal can separation |  |  |  |  |  |
| 84 | Wet waste separation |  |  |  |  |  |
| 85 | Plastic waste separation |  |  |  |  |  |
| 86 | Designate a part of the house for separated waste |  |  |  |  |  |
